# Supplementary material for: Hierarchical PdNi alloy nanochains coupled with Ni(OH)2 nanosheets to enhance CO-poisoning resistance for the methanol oxidation reaction
Source: Royal Society of Chemistry journal article supplement (doi:10.1039/d3nr02487c), 2023-01-01
Supplement: d3nr02487c1.pdf [file d3nr02487c1.pdf]

# Hierarchical PdNi alloy nanochains coupled with Ni(OH)<sub>2</sub> nanosheets to enhance the CO-poisoning resistance for methanol oxidation reaction

Anzhou Yang, ‡<sup>ab</sup> Keying Su, ‡<sup>a</sup> Yujia Liang,<sup>a</sup> Shan Yang,<sup>a</sup> Wu Lei,<sup>b</sup> Yawen Tang,<sup>\*a</sup> and Xiaoyu Qiu<sup>\*a</sup>

<sup>a</sup> *Jiangsu Key Laboratory of New Power Batteries, Jiangsu Collaborative Innovation Center of Biomedical Functional Materials, School of Chemistry and Materials Science, Nanjing Normal University, Nanjing 210023, P. R. China*

<sup>b</sup> *School of Chemical Engineering, Nanjing University of Science and Technology, Nanjing 210094, P. R. China*

## Experimental Section

### Reagents and Chemicals

Potassium tetrachloroplatinate (II) ( $K_2PdCl_4$ ) were purchased from Shanghai D&B biological Sci-Tech Co., Ltd. (Shanghai, China). Potassium tetracyanonickelate ( $K_2[Ni(CN)_4]$ ) was obtained from the Alfa Aesar chemical Co., Ltd (Shanghai, China). Poly (diallyl dimethyl ammonium chloride) (PDDA,  $M_w$ : 200,000-350,000), borane-tert-butylamine complex ( $C_4H_{14}BN$ ) and commercial Pd black were purchased from Aladdin industrial corporation. (Shanghai, China). All chemicals used in this study were of analytical reagent (AR) without any further purification.

### Synthesis of PdNi nanochains@Ni(OH)<sub>2</sub> nanosheets (PdNi NCs@Ni(OH)<sub>2</sub> NSs)

Typically, 1 mL of  $K_2PdCl_4$  (0.05 M), 2 mL of PDDA (0.25 M) and 1 mL of  $K_2[Ni(CN)_4]$  (0.05 M) were successively added to 5 mL of deionized water under magnetic stirring. Afterwards, 1 mL of  $C_4H_{14}BN$  solution (5 mg mL<sup>-1</sup>) was dropwise added into above solution. The mixture was stirred under room temperature for 1 h, and then underwent centrifugation at 18000 rpm for 8 min, washed with deionized water, and dried at 45 °C for 8 h in a vacuum dryer to collect the final products.

### Characterizations

The morphology of PdNi NCs@Ni(OH)<sub>2</sub> NSs were firstly examined by high-resolution (HR) transmission electron microscopy (TEM) pictures (JEOL JEM-2100F, operated at 200 kV) and scanning electron microscopy (SEM) image (Hitachi S-4800, operated at 5 kV voltage). The components were tested by Energy Dispersive X-ray (EDX) measurements (JEOL JSM-7600F-type). UV-vis spectra were recorded on a Shimadzu UV3600 spectrophotometer equipped with an optical path length of 1 cm at room temperature. X-Ray Diffraction (XRD) patterns were carried out on Model D/max-rC X-ray diffractometer operated at 40 kV and 100 mA by using Cu K $\alpha$  radiation source ( $\lambda = 1.5406 \text{ \AA}$ ). High-resolution X-ray photoelectron spectroscopy (XPS) data were carried out on a Thermo VG Scientific ESCALAB 250 spectrometer with an Al K $\alpha$  radiator and the binding energy was calibrated by means of the C 1s peak energy of 284.6 eV. XPS data were analyzed using XPS PEAK 4 software, and the binding energy was calibrated by means of the C 1s peak energy of 284.6 eV. The N<sub>2</sub>

adsorption/desorption isotherms were measured at 77 K using a Micromeritics ASAP 2050 system. The specific surface area was calculated by Brunauer-Emmett-Teller method. The pore size distribution was determined using quenched solid density functional theory model for slit shaped and cylindrical pores.

### **Electrochemical measurements**

All electrochemical measurements were carried out on a CHI 760E electrochemical analyzer (CH Instruments, Inc., Shanghai, China) at 25 °C. A conventional three-electrode cell was used, including a saturated calomel electrode (SCE) as the reference electrode, a graphite rod as the auxiliary electrode, and a catalyst-modified glassy carbon electrode as the working electrode. The catalyst ink was prepared by ultrasonically dispersing the mixture of 4 mg of catalyst, 0.8 mL of alcohol and 1.2 mL of deionized water. Then 5  $\mu$ L of the catalyst ink was dropped onto the clean surface of glassy carbon electrode. After drying, the modified electrode was covered with 2  $\mu$ L of Nafion solution (5 wt%) and dried again. The MOR performance of catalysts were evaluated in N<sub>2</sub>-saturated 1 M KOH with or without 0.5 M CH<sub>3</sub>OH solution at a scan rate of 50 mV s<sup>-1</sup>. ECSA were calculated by the following formula:

$$ECSA = \frac{Q}{0.402 \text{ mC cm}^{-2} * m_{Pd}}$$

The MOR stability of PdNi NCs@Ni(OH)<sub>2</sub> NSs was examined by using chronoamperometry technique at a fixed potential of -0.2 V. The onset potential ( $E_{\text{onset}}$ ) was measured by making a point of intersection, where the tangent of the reduction peak intersected with the horizontal line of zero current. CO stripping experiments were conducted in 1 M KOH. The electrolyte was first bubbled with 10% CO/N<sub>2</sub> while holding the working electrode at 1.0 V for 30 min. Then the solution was purged by flowing N<sub>2</sub> for 30 min to dislodge residual CO. Finally, the CV cycles were carried out from -0.8 to 0.2 V at 50 mV s<sup>-1</sup> to record the CO stripping voltammetry.

## Figures

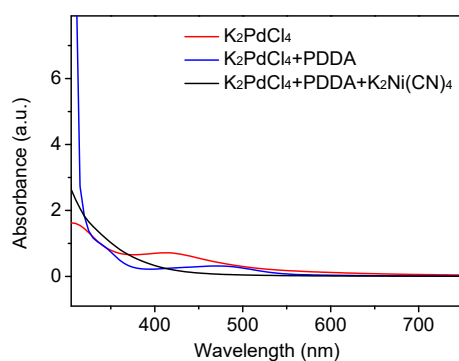

**Fig. S1** UV-vis spectra of  $K_2PdCl_4$  solution,  $K_2PdCl_4 + PDDA$  solution, and  $K_2PdCl_4 + PDDA + K_2[Ni(CN)_4]$  solution.

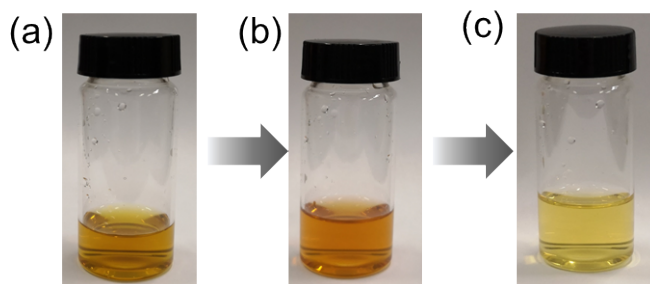

**Fig. S2** (a) Photos of  $K_2PdCl_4$  solution, (b)  $K_2PdCl_4 + PDDA$  solution, and (c)  $K_2PdCl_4 + PDDA + K_2[Ni(CN)_4]$  solution

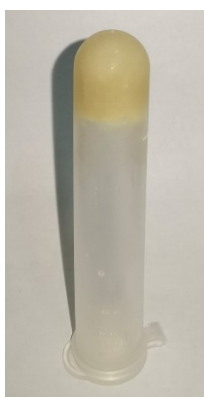

**Fig. S3** Photograph of the PdNi cyanogels.

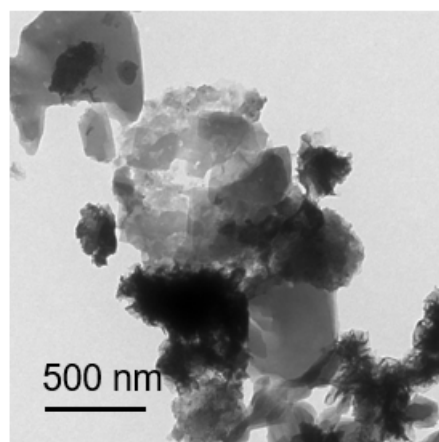

**Fig. S4** Products obtained without adding PDDA.

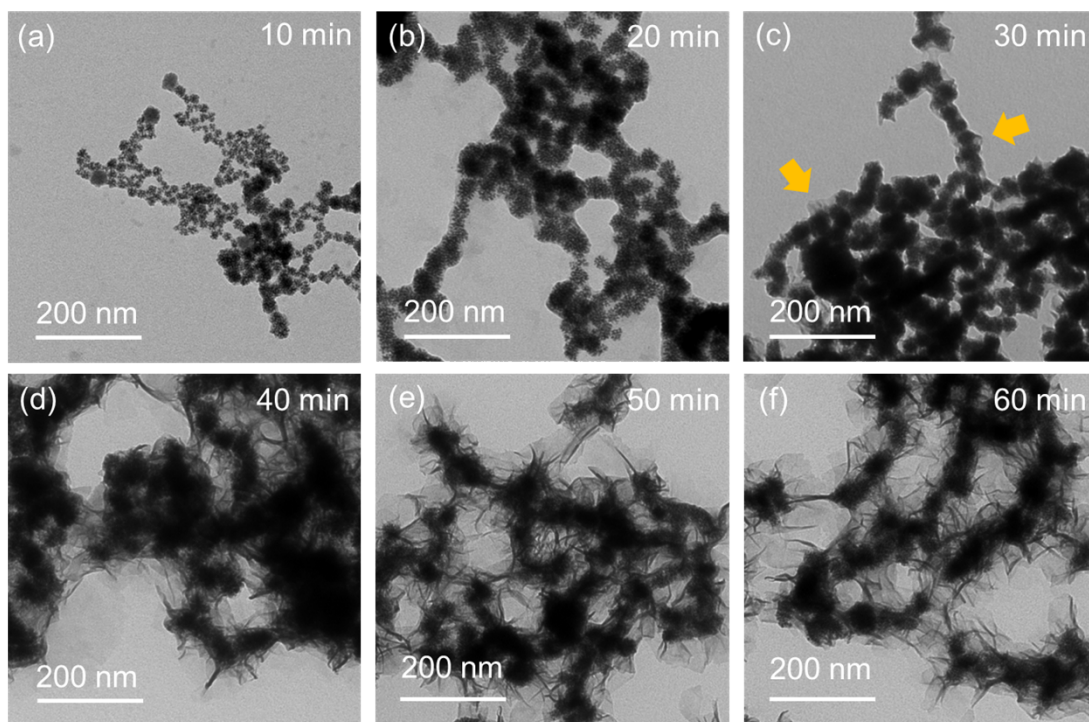

**Fig. S5** Typical TEM images of intermediates collected at different reaction intervals.

(a) 10 min, (b) 20 min, (c) 30 min, (d) 40 min, (e) 50 min, and (d) 60 min.

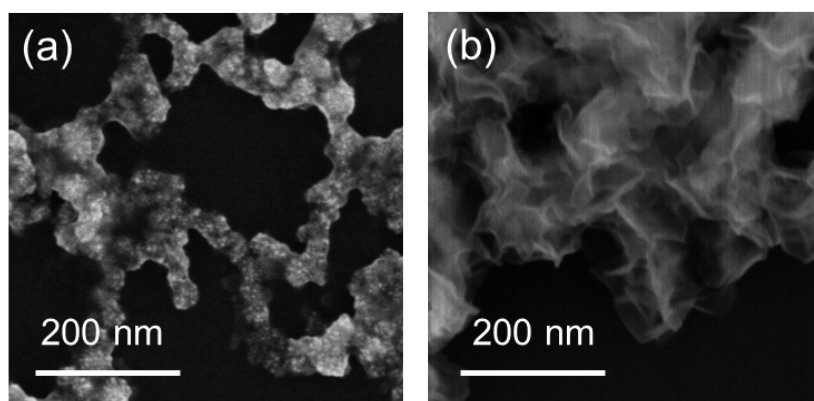

**Fig. S6** SEM images of the (a) PdNi NCs and (b) PdNi NCs@Ni(OH)<sub>2</sub> NSs.

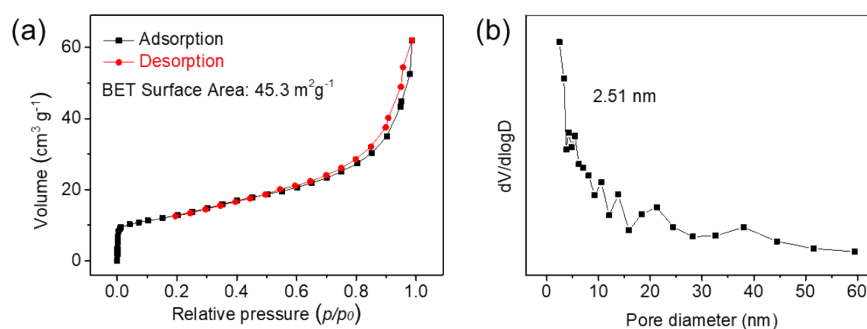

**Fig. S7** (a) N<sub>2</sub> adsorption-desorption isotherms and (b) meso-pore size distribution of the PdNi NCs.

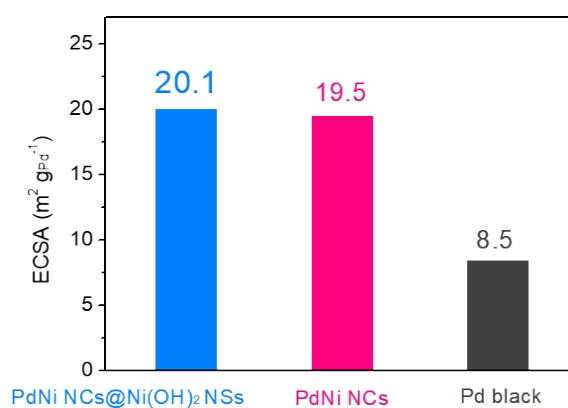

**Fig. S8** ECSA histogram of PdNi NCs@Ni(OH)<sub>2</sub> NSs, PdNi NCs and Pd black.

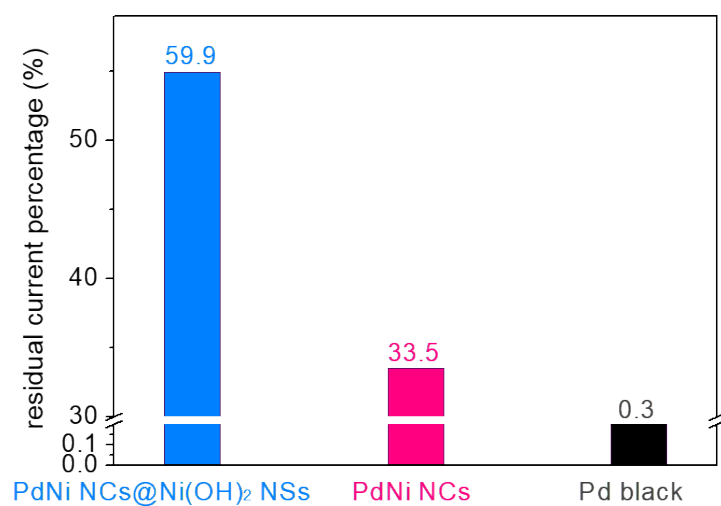

**Fig. S9** Comparison of the stability of PdNi NCs@Ni(OH)<sub>2</sub> NSs and controllable samples.

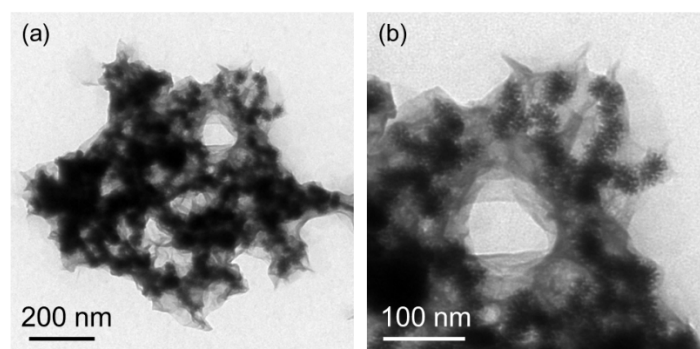

**Fig. S10** TEM images of the PdNi NCs@Ni(OH)<sub>2</sub> NSs after chronoamperometry tests.

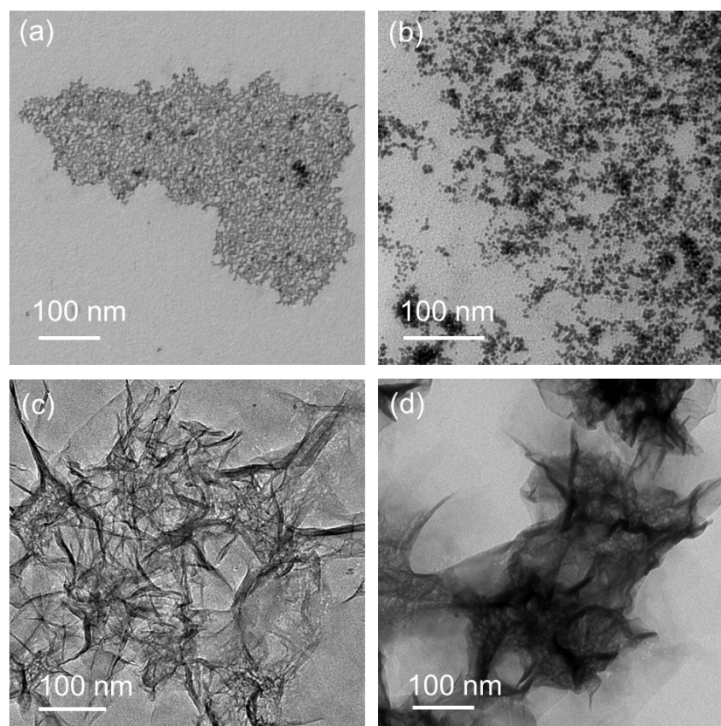

**Fig. S11** TEM images of products prepared with (a) pure  $\text{Pd}^{2+}$  precursor, (b) Pd/Ni ratio of 4:1, (c) Pd/Ni ratio of 1:4, (d) pure  $[\text{Ni}(\text{CN})_4]^{2-}$  precursor.

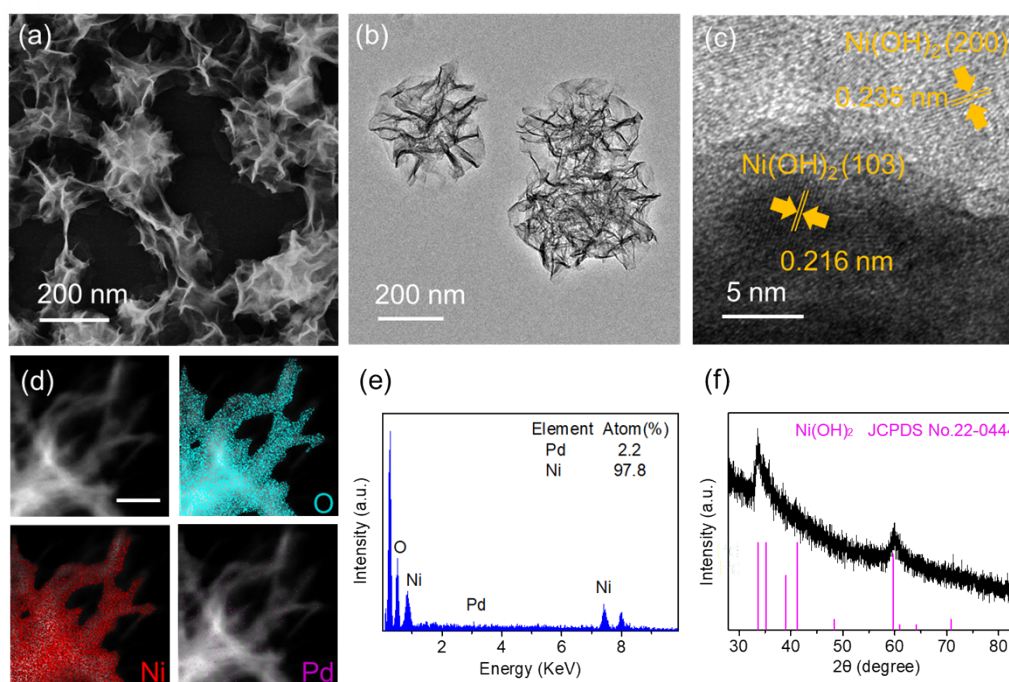

**Fig. S12** (a) HADDF-STEM image, (b-c) HRTEM images, (d) elemental mapping images, (e) EDX spectrum, and (f) XRD pattern of  $\text{Ni}(\text{OH})_2$  NFs.



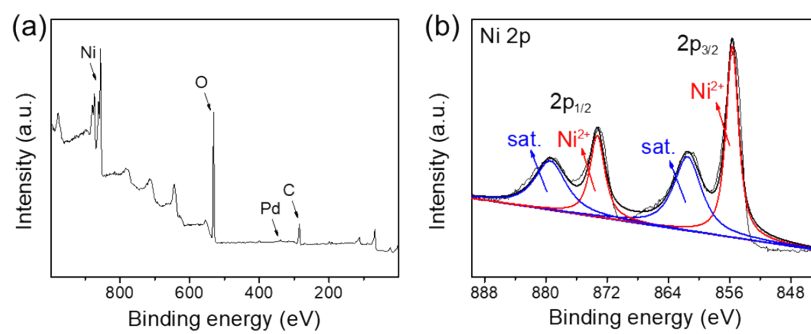

**Fig. S13** (a) Full XPS survey of Ni(OH)<sub>2</sub> NFs. (b) High-resolution XPS survey at Ni 2p region.
